# Supplementary material
Source: Springer Nature journal article supplement (https://www.springermedizin.de/resource/supplementary/12936_2013_2937_MOESM1_ESM.pdf/9544604)
Supplement: MOESM1 [file 9544604]

**a.** between-method differences (RA-RC) against volumes measured for antimalarials sold at wholesale outlets

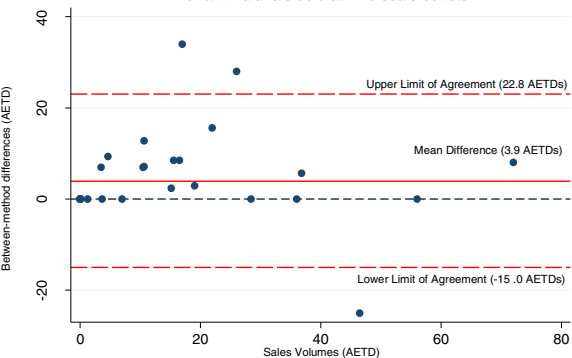

Source: Wholesale Sales Level Survey, August-September 2009

**b.** between-method differences (RA-RC) against volumes measured for antimalarials sold at retail outlets

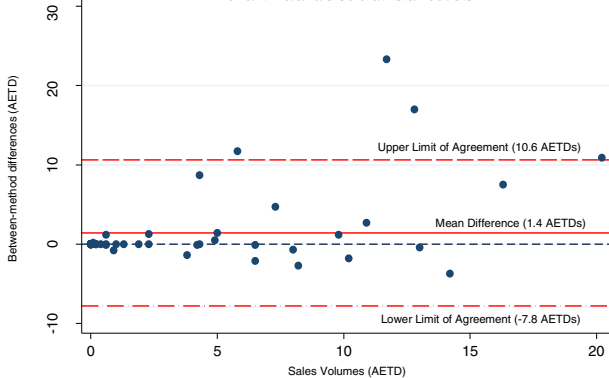

Source: Retail Sales Level Survey, October 2009

**c.** between-method differences (RA-RC) against volumes measured for RDTs sold at wholesale outlets

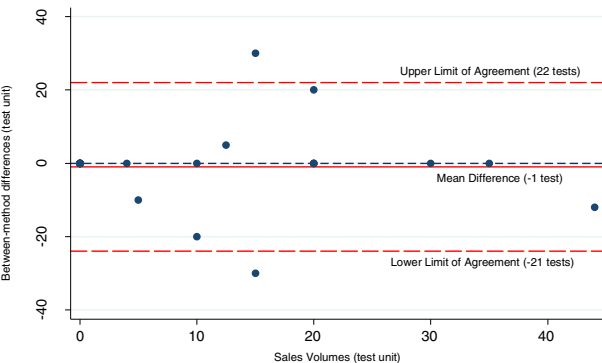

Source: Wholesale Sales Level Survey, August-September 2009

**d.** between-method differences (RA-RC) against volumes measured for RDTs sold at retail outlets

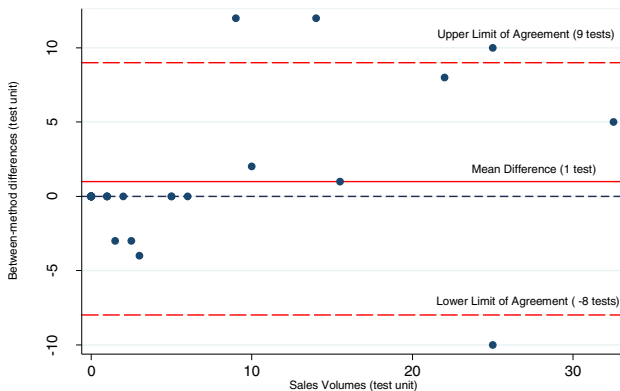

Source: Retail Sales Level Survey, October 2009
